# Supplementary material
Source: Springer Nature journal article supplement (https://www.springermedizin.de/resource/supplementary/12882_2013_755_MOESM3_ESM.pdf/9454648)
Supplement: MOESM3 [file 9454648]

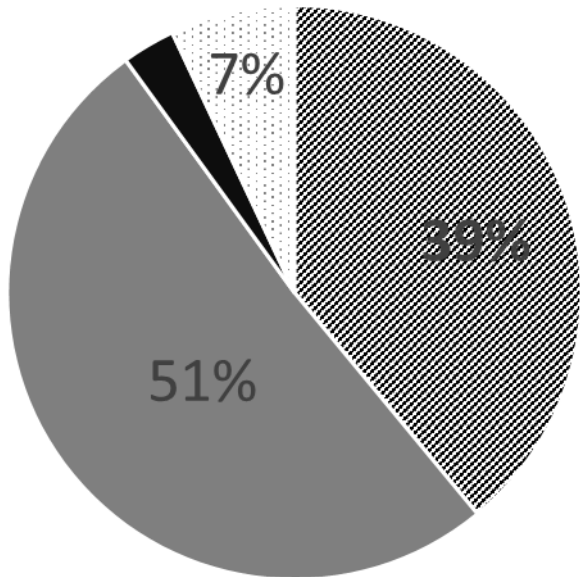

▨ Yes ■ No (not familiar) ■ No (familiar, not useful) ∴ Uncertain

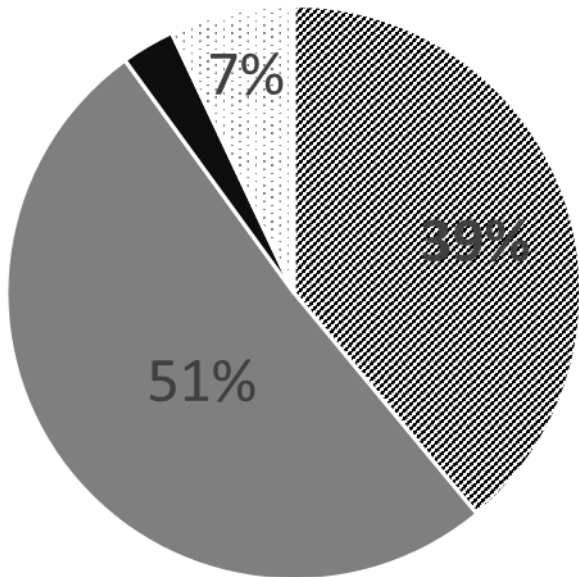

▨ Yes ■ No (not familiar) ■ No (familiar, not useful) ▨ Uncertain
